# Supplementary material
Source: publisher figshare collection journal article supplement (https://acs.figshare.com/ndownloader/files/36017957)
Supplement: Supplementary file 1 [file 36017957]

## Supporting Information

Atomic oxygen resistance vitrimers with high strength, recyclability and thermal stability

*Yao Zhang<sup>‡</sup>, Hu Xu<sup>‡</sup>, Hao Wang, Rui Wu, Biqiang Jin and Jinrong Wu\**

Y Zhang<sup>‡</sup>, H Xu<sup>‡</sup>, Dr. H Wang, R Wu, Dr. B Jin, Prof. J Wu

State Key Laboratory of Polymer Materials Engineering

College of Polymer Science and Engineering at Sichuan University

Chengdu 610065, China

E-mail: [wujinrong@scu.edu.cn](mailto:wujinrong@scu.edu.cn)

<sup>‡</sup>These authors contributed equally to this paper.

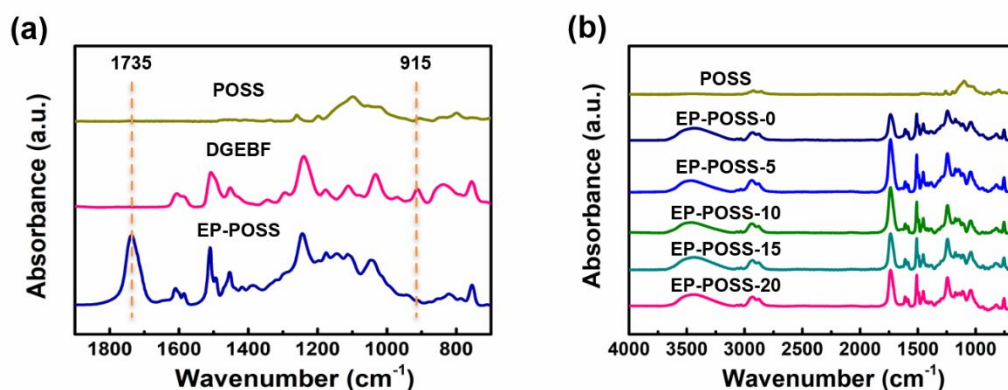

**Figure. S1.** FTIR spectra of EP-POSS vitrimers. The characteristic peaks at 910cm<sup>-1</sup>, 1735cm<sup>-1</sup> and 3459cm<sup>-1</sup> are belonged to the stretching vibration peak of C-O-C in epoxy groups, the C=O stretching vibration peak in ester bonds and the stretching vibration peak of O-H, respectively.<sup>1,2</sup> In EP-POSS vitrimers, the stretching vibration peak of Si-O-Si (1105 cm<sup>-1</sup>) becomes stronger gradually from EP-POSS-0 to EP-POSS-20, indicating that the POSS molecules participate in the crosslinking reaction of epoxy resin.

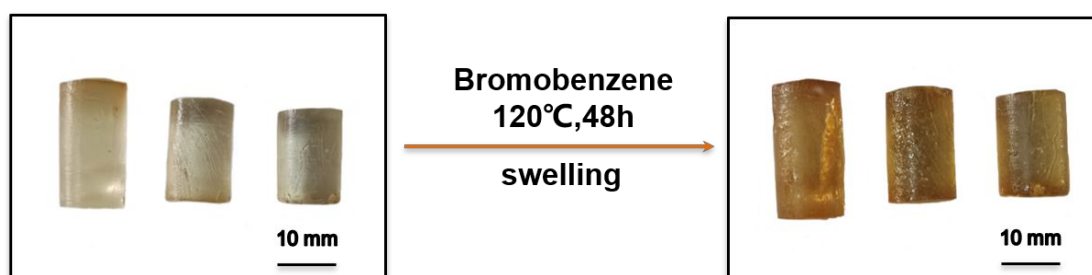

**Figure. S2.** Photographs of EP-POSS vitrimers before (left) and after (right) swelling experiments. After swelling for 48 h, EP-POSS-0, EP-POSS-10 and EP-POSS-20 were undissolved but swelled in bromobenzene, which indicated all samples had crosslinked network and exchange reactions did not dissociate the molecular chain at high temperature.

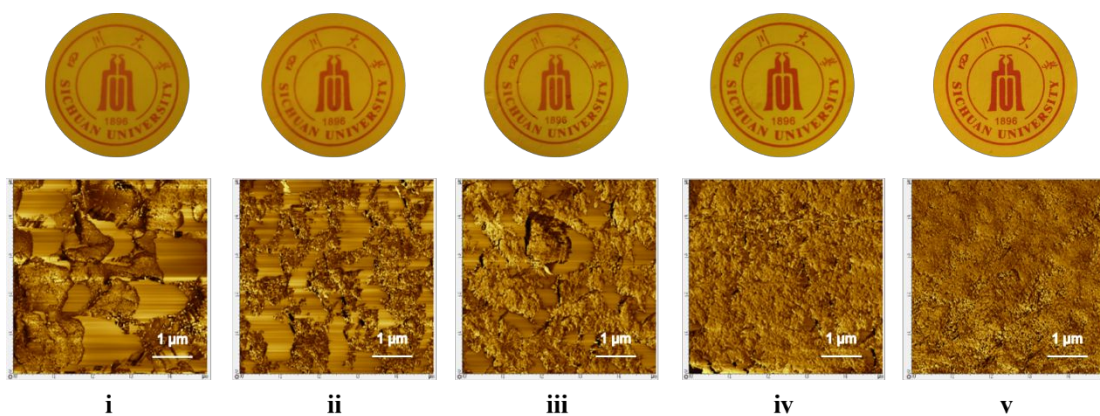

**Figure S3.** Photographs (top) and AFM images (bottom) of EP-POSS vitrimers after AO tests, mass percentage of POSS is 0 to 20 wt% from I to V.

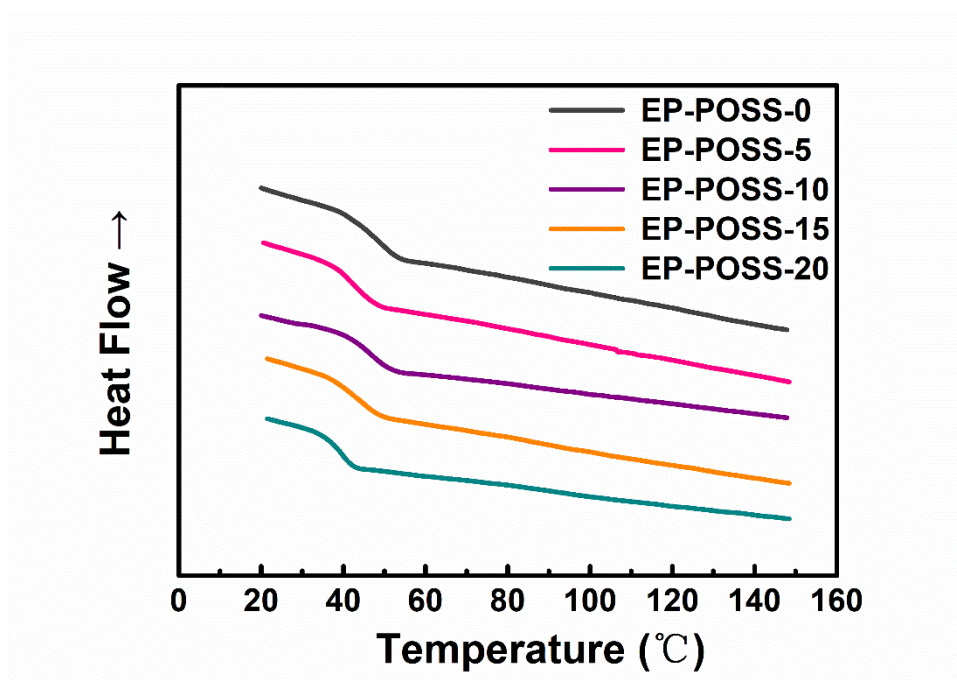

**Figure S4.** DSC curves of EP-POSS vitrimers.

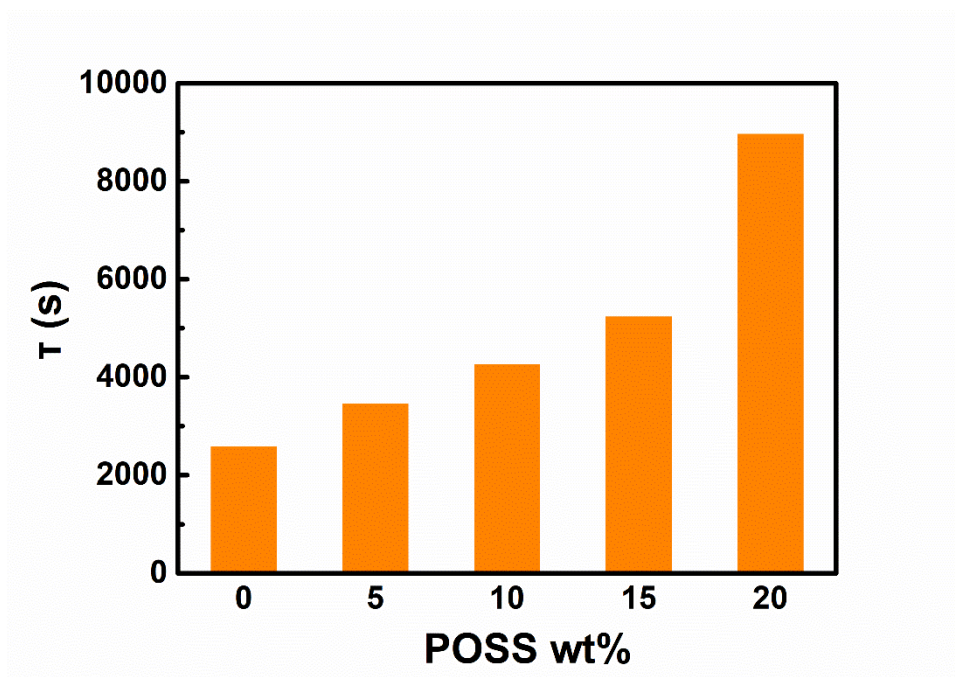

**Figure S5.** Relaxation times of EP-POSS vitrimers at 200°C.

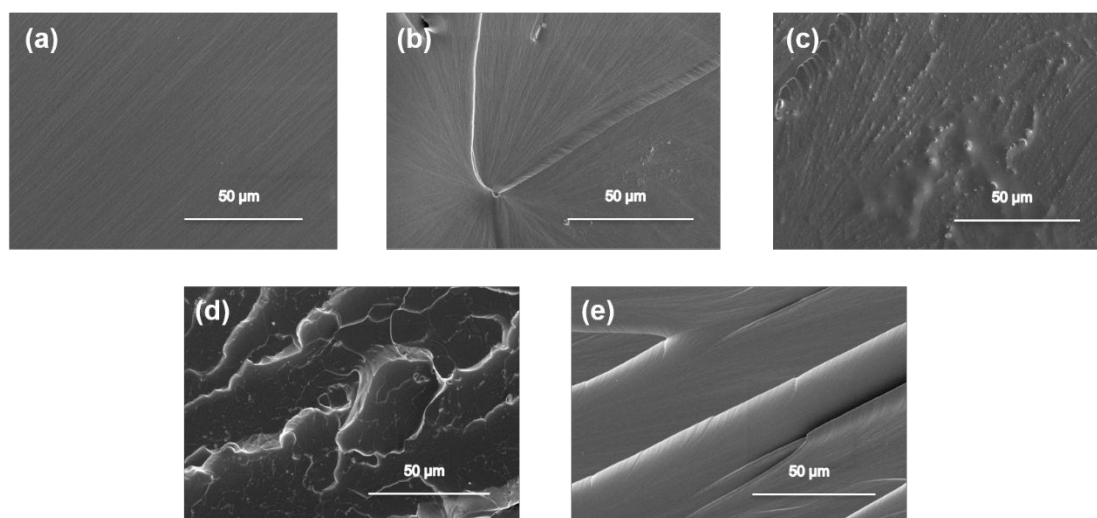

**Figure S6.** SEM images of fracture surfaces from tensile samples: (a) pure epoxy resin vitrimers, (b) 5 wt% POSS, (c) 10 wt% POSS, (d) 15 wt% POSS, and (e) 20 wt% POSS. Epoxy resin obviously showed brittle fracture due to the highly crosslinked structure, while the fracture surfaces of EP-POSS vitrimers are rougher than that of pure epoxy resin, large amounts of river-like stripes indicate that the fracture mode of EP-POSS

vitrimers is ductile fracture and POSS has the strengthening and toughening effect on epoxy resin vitrimers.

**Table S1.** Thermal stability properties of epoxy resin with varying POSS contents calculated from TGA curves.

| <i>POSS wt%</i> | <i>T<sub>i</sub> (°C)</i> | <i>T<sub>max</sub> (°C)</i> | <i>Char yield (%)</i> |
|-----------------|---------------------------|-----------------------------|-----------------------|
| <i>0</i>        | 318.67                    | 418.33                      | 21.09                 |
| <i>5</i>        | 326.33                    | 418.36                      | 23.55                 |
| <i>10</i>       | 311.0                     | 418.37                      | 25.44                 |
| <i>15</i>       | 314.72                    | 422.63                      | 26.06                 |
| <i>20</i>       | 315.16                    | 422.65                      | 27.16                 |

*T<sub>i</sub>* is the initial decomposition temperature (char yield is 98%), *T<sub>max</sub>* is the temperature at the fastest decomposition, and the char yield at 800°C.

**Table S2.** AO tests results of EP-POSS vitrimers.

| <i>POSS wt%</i> | <i>m<sub>1</sub><sup>a</sup> (g)</i> | <i>m<sub>2</sub><sup>b</sup> (g)</i> | <i>Δm<sup>c</sup> (mg/cm<sup>2</sup>)</i> | <i>Roughness (nm)</i> | <i>E<sub>s</sub><sup>d</sup> (×10<sup>-24</sup>cm<sup>3</sup>/O atom)</i> | <i>Δd<sup>e</sup> (×10<sup>4</sup> cm)</i> |
|-----------------|--------------------------------------|--------------------------------------|-------------------------------------------|-----------------------|---------------------------------------------------------------------------|--------------------------------------------|
| <i>0</i>        | 0.1500                               | 0.1444                               | 0.792                                     | 374                   | 3.185                                                                     | 7.581                                      |
| <i>5</i>        | 0.1344                               | 0.1315                               | 0.410                                     | 156                   | 1.650                                                                     | 3.926                                      |
| <i>10</i>       | 0.1904                               | 0.1881                               | 0.325                                     | 129                   | 1.308                                                                     | 3.114                                      |
| <i>15</i>       | 0.1588                               | 0.1573                               | 0.212                                     | 49                    | 0.853                                                                     | 2.031                                      |
| <i>20</i>       | 0.1261                               | 0.1252                               | 0.127                                     | 26                    | 0.512                                                                     | 1.218                                      |

**Table S3.** Surface atomic concentrations (atom %) determined from XPS before and after exposure to AO fluences.

| <i>POSS</i> | <i>Unexposed Samples</i> |             |              | <i>AO Exposed Samples</i> |             |             |              |
|-------------|--------------------------|-------------|--------------|---------------------------|-------------|-------------|--------------|
| <i>wt%</i>  | <i>C 1s</i>              | <i>O 1s</i> | <i>Si 2p</i> | <i>C 1s</i>               | <i>O 1s</i> | <i>N 1s</i> | <i>Si 2p</i> |
| <i>0</i>    | 79.79                    | 20.21       | 0            | 77.16                     | 18.84       | 4.00        | 0            |
| <i>5</i>    | 75.27                    | 19.23       | 5.50         | 54.66                     | 28.93       | 1.97        | 14.45        |
| <i>10</i>   | 73.56                    | 20.15       | 6.29         | 53.17                     | 30.19       | 1.58        | 15.07        |
| <i>15</i>   | 72.55                    | 19.48       | 7.97         | 45.27                     | 34.57       | 3.18        | 16.98        |
| <i>20</i>   | 69.60                    | 20.69       | 9.71         | 29.50                     | 40.76       | 9.69        | 20.04        |

**Table S4.** DMA, DSC results and crosslinking density of EP-POSS vitrimers.

| <i>POSS</i><br><i>wt%</i> | $E_g^a(\text{MPa})$ | $E_r^b(\text{MPa})$ | $T_g^c(^{\circ}\text{C})$ | $T_g^d(^{\circ}\text{C})$ | $M_c(\text{kg}\cdot\text{mol}^{-1})$ | $V_c(\text{mol}\cdot\text{m}^{-3})$ |
|---------------------------|---------------------|---------------------|---------------------------|---------------------------|--------------------------------------|-------------------------------------|
| <i>0</i>                  | 2710                | 4.0                 | 68.7                      | 45.1                      | 2.7                                  | 435.1                               |
| <i>5</i>                  | 6896                | 5.8                 | 59.9                      | 41.9                      | 1.8                                  | 637.8                               |
| <i>10</i>                 | 7415                | 7.0                 | 62.3                      | 47.9                      | 1.5                                  | 764.2                               |
| <i>15</i>                 | 12080               | 7.6                 | 66.1                      | 44.2                      | 1.4                                  | 821.2                               |
| <i>20</i>                 | 3694                | 11.4                | 63.9                      | 42.2                      | 0.9                                  | 1248.5                              |

<sup>a</sup>  $E_g$  is the glassy storage modulus at 25°C, <sup>b</sup>  $E_r$  is the rubbery storage modulus taken 30°C above  $T_g$ , <sup>c</sup>  $T_g$  is the glass transition temperature measured by DMA, <sup>d</sup>  $T_g$  is the glass transition temperature measured by DSC.

**Table S5.** Tensile results of EP-POSS vitrimers.

| <i>POSS</i><br><i>wt%</i> | <i>Tensile strength</i><br>(MPa) | <i>Elastic modulus</i><br>(MPa) | <i>Elongation at break</i> (%) | <i>Fracture toughness</i> (kJ·m <sup>-3</sup> ) |
|---------------------------|----------------------------------|---------------------------------|--------------------------------|-------------------------------------------------|
| <i>0</i>                  | 77.59±10.23                      | 1746±172                        | 6.91±0.24                      | 39.84±3.16                                      |
| <i>5</i>                  | 93.86±1.22                       | 2164±260                        | 6.85±0.33                      | 40.03±2.71                                      |
| <i>10</i>                 | 94.36±0.2                        | 1637±50                         | 8.71±0.52                      | 54.98±4.80                                      |
| <i>15</i>                 | 92.10±1.5                        | 1994±113                        | 6.80±0.73                      | 41.36±1.04                                      |
| <i>20</i>                 | 84.52±3.97                       | 1668±151                        | 8.21±0.58                      | 47.18±2.56                                      |

## SI References

- (1) Yang, H.; He, C.; Russell, T. P.; Wang, D. Epoxy-Polyhedral Oligomeric

Silsesquioxanes (POSS) Nanocomposite Vitrimers with High Strength, Toughness, and Efficient Relaxation. *Giant* **2020**, *4*.

<https://doi.org/10.1016/j.giant.2020.100035>.

- (2) Liu, H.; Li, J.; Gao, X.; Deng, B.; Huang, G. Double Network Epoxies with Simultaneous High Mechanical Property and Shape Memory Performance. *J. Polym. Res.* **2018**, *25* (2). <https://doi.org/10.1007/s10965-017-1427-9>.
